# Supplementary material
Source: PubMed Central journal article supplement (PMC2768518)
Supplement: NIHMS105083-supplement-1.pdf [file NIHMS105083-supplement-1.pdf]

## Danger signal and PAMP sensing define binary signaling pathways upstream of Toll

Laure El Chamy, Vincent Leclerc, Isabelle Caldelari & Jean-Marc Reichhart

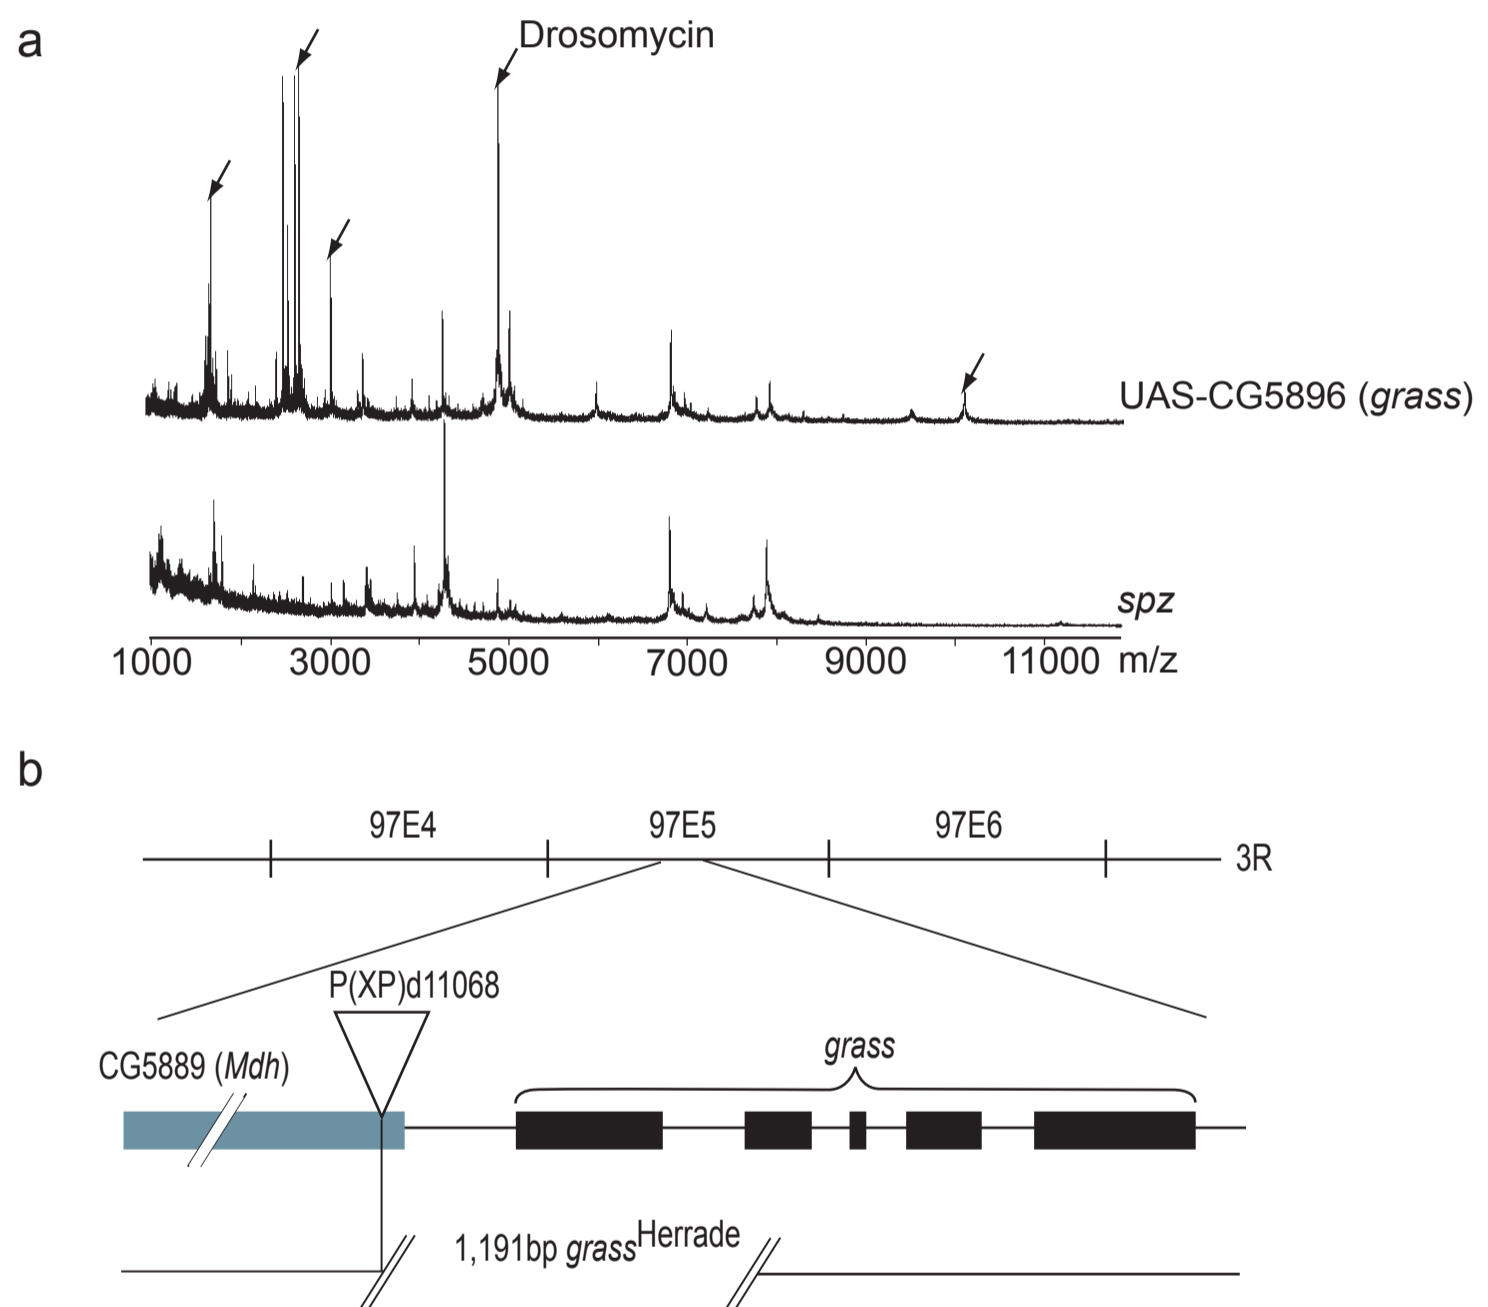

### Supplementary figure 1. Isolation of a *grass* null mutant allele

(a) Mass spectrometry analysis of hemolymph samples extracted from non infected transgenic flies overexpressing *grass* shows the expression of drosophila Immune Molecules (IMs, black arrows). Hemolymph sample extracted from infected *spatzle* (*spz*) mutants is used as a control.

(b) Schematic representation of the right arm of *Drosophila melanogaster* third chromosome region where *grass* is localized. Exons are presented by filled boxes: black for *grass* and grey for the last exon of *CG5889*. The mobilisation of a P-element (*d11068*) inserted in the 3'UTR of the *CG5889* (light grey box), 550 bp upstream of the *grass* transcription start site, gave rise to the *grass*<sup>Herrade</sup> deletion of 1191 bp from the insertion site down to the 735<sup>th</sup> nucleotide of the *grass* transcript.

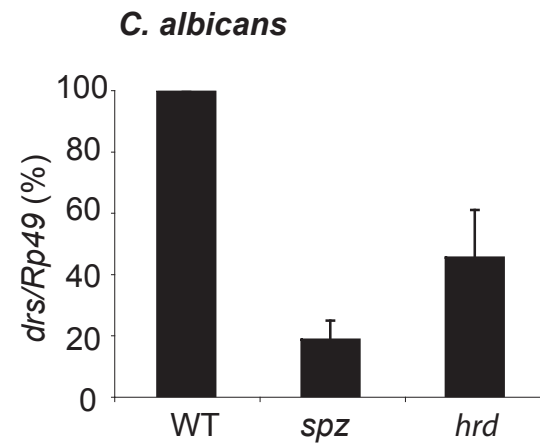

**Supplementary figure 2. Grass is required for Toll pathway activation after yeast infection**

Quantification of RNA hybridization analysis of *drosomycin* (*drs*) gene expression 48 hours after infection with the yeast *Candida albicans*. *Ribosomal protein 49* (*Rp49*) messenger was used for normalisation. *drs* mRNA expression (*drs/Rp49*) in wild-type (WT) flies was set to 100 as a control and values obtained with mutant flies were expressed as percentage of this value. *Spatzle* (*spz*) mutant flies were used as Toll pathway mutant control. Each bar represents the mean of 3 independent experiments, error bars are SD. *drs* expression was highly reduced in *grass<sup>Herrade</sup>* (*hrd*) mutant flies ( $P = 0.036$ ).

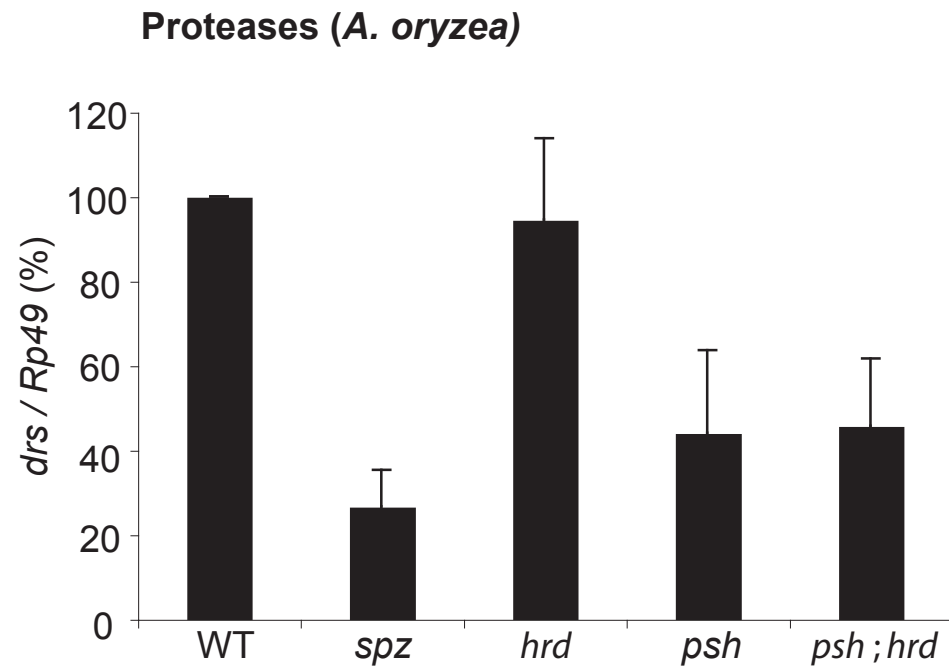

**Supplementary figure 3. Activation of Toll pathway by *A. oryzae* proteases**

Quantification of RNA hybridization analysis of *drosomycin* (*drs*) gene expression tested 24 hours after injection of a sublethal dose of fungal *A. oryzae* proteases in adult flies. *drs* expression is not affected in *grass<sup>Herrade</sup>* (*hrd*) ( $P=0.6$ ) but is highly reduced in *psh* mutant flies ( $P= 0.004$ ). The reduction in *drs* expression observed in *psh* is not enhanced in *psh, hrd* double mutants ( $P=0.9$ ).
